# Supplementary material for: Genome-Wide Methylation Changes in the Brains of Suicide Completers
Source: Atypon-hosted journal article supplement (doi:10.1176/appi.ajp.2012.12050627), 2013-03-20
Supplement: 511_ds001.pdf [file 511_ds001.pdf]

## **Supplemental Information, Figures and Tables**

### **Supplemental Material and Methods**

#### **Subjects**

Brain tissue was obtained from the Quebec Suicide Brain Bank (QSBB; Douglas Mental Health Institute, Verdun, Québec). All subjects were Caucasians of French–Canadian descent, a population with a well-identified founder effect(1). All individuals were male and group-matched for age, pH and post-mortem intervals (PMI) (see STable1). There was no difference across groups for age (Suicide: 38.8±11.4; CTRL: 40.9±14.3;  $t_{(1,60)} = -0.59$ ,  $p > 0.1$ ), pH (Suicide: 6.6±0.3; CTRL: 6.5±0.3;  $t_{(1,60)} = 0.46$ ,  $p > 0.1$ ), and PMI (Suicide: 31.3±14.2; CTRL: 32.6±15.1;  $t_{(1,60)} = -0.31$ ;  $p > 0.1$ ). Inclusion criteria also included sudden death without prolonged agonal state. Brain tissue samples (dentate gyrus) from the left hemisphere were obtained from sixty-two subjects (46 suicide and 16 CTRL) and carefully dissected at 4°C after having been flash-frozen in isopentane at -80°C. Dissection of the HPC was performed by histopathologists using reference neuroanatomical maps(2, 3). The project was approved by the Research Ethics Board at the Douglas University Mental Health Institute and signed informed consent was obtained from next of kin. Part of the sample investigated in this report has been used in a recently published study investigating the epigenetic effects of early-life adversity(4). However, the sample investigated in the current study is substantially larger.

#### **Psychological Autopsies**

Information on psychopathology, socio-demographic variables and development was obtained by way of psychological autopsies performed by trained clinicians with the informants best acquainted with the deceased, as described elsewhere(5). The process employed by our group in the collection of information used in psychological autopsies has been extensively investigated and found to produce valid information, especially in the context of observable behaviors and major life events(5-11). Both cases and controls were characterized by the same psychological autopsy methods, therefore avoiding the occurrence of systematic biases.

#### **Psychopathology**

Diagnoses were obtained using DSM-IV(12) criteria by means of SCID-I interviews(13) adapted for psychological autopsies. Psychopathology did not have a significant effect on methylation differences, with the exception of substance disorders. We adjusted for the effects of substance disorders in our analyses (see Statistical and Bioinformatic Analyses).

#### **Methylated DNA Immunoprecipitation (meDIP), Labelling and Hybridization** **MeDIP**

Methylated DNA was extracted following an adaptation of a methylated DNA immunoprecipitation (meDIP) method developed previously(14). Briefly, 6pg of green fluorescent protein (GFP) and methylated luciferase (mLUC) plasmids was combined with 3 ug of genomic DNA and sonicated in order to create 300 to 800 bp fragments. A

representative fraction of genomic DNA (input) was immediately isolated. The remaining DNA was incubated with sepharose beads (GE Healthcare) and 5' methylcytosine antibody (Calbiochem) overnight. The preparation was then spun on a SpinX column (Corning Inc) and the flow-through was recovered as the unmethylated DNA fraction. The remaining DNA was thoroughly washed and the methylated DNA fraction was recovered. Input, unmethylated and methylated fractions were then purified by phenol-chloroform and precipitated in ethanol. Enrichment in either methylated or unmethylated DNA was assessed by PCR using primers targeting external (GFP, mLUC) and internal controls (B-Actin, H19) for input, unbound and bound fractions.

### **Labelling**

Input and methylated DNA fractions were amplified using the GenomePlex Complete Whole Genome Amplification (WGA) Kit (Sigma) and purified using the GenElute PCR Clean-Up Kit (Sigma) following manufacturer's instructions. DNA concentration and quality was assessed on a NanoDrop ND-1000 UV-VIS Spectrophotometer (NanoDrop Technologies, Rockland, DE, USA). Input and methylated fractions were labeled to Cyanine 3-dUTP (Cy3) and Cyanine 5-dUTP (Cy5) using the Agilent Genomic Enzymatic Labeling Kit and then cleaned up using microcon Y-30 filters (Millipore). DNA yield and labeling specificity was assessed on Nanodrop. All samples reached the minimum Cy3 and Cy5 specific activity thresholds of 35 to 55pg and 25 to 40pg of DNA, respectively, and quantity ranges of 7 to 10µg of DNA.

### **Hybridization**

Hybridization, washing steps, scanning and data extraction were performed following manufacturer's instructions (Agilent). Every subject was hybridized on a separate microarray. For all samples, dye swaps were performed in order to control for dye integration bias. Hybridization was performed for 40 hours at 60°C in rotating chambers. All microarrays were washed with acetonitrile, stabilization, and drying solution in order to avoid ozone degradation of Cy5. Following washing steps, microarrays were scanned using an Agilent High-Resolution C Scanner (Agilent) at a resolution of 3µm under XDR mode. Data were extracted using Feature Extraction software (Agilent). For each sample, quality control (QC) reports were used in order to assess hybridization quality. Hybridization was assessed based on the following criteria: background noise <10, signal intensity >50, reproducibility <0.2 and derivative LR spread <0.3.

### **Microarray Analysis**

#### ***Microarray design***

A custom-designed 400K promoter tiling array was used for this study (Agilent). The array was designed using Agilent's array design platform eArray. Probes were selected to tile all known gene promoters, i.e. intervals roughly 2000 bp upstream to 400 bp downstream of the transcription start sites of genes described in Ensembl (version 55) at 100 bp-spacing.

#### ***MeDIP microarray normalization***

Extracted microarray intensities were processed and analyzed using the R software environment for statistical computing(15). Log-ratios of the bound (Cy5) and input (Cy3)

microarray channel intensities were computed for each microarray, and then microarrays were normalized to one another using quantile-normalization(16) under the assumption that all samples have identical overall methylation levels.

### **Statistical and Bioinformatic Analyses**

Methylation levels were estimated from normalized probe intensities by applying a Bayesian deconvolution algorithm(17). Promoter methylation levels were obtained taking the median estimated methylation level across each promoter. Promoters were defined as the region 2000 to -400bp of the transcription start sites of each gene.

Differential methylation between groups of samples was determined in several stages to ensure both statistical significance and biological relevance. In the first stage, linear models implemented in the ‘limma’ package(18) of Bioconductor(19) were used to combine the two dye labeling schemes from the dye swaps and to compute a modified t-statistic for each probe. Models were adjusted for selected covariables based on a combination of domain knowledge and variance analysis of the microarray data. Eigen-R2 (20) was used to estimate the amount of variance in the microarray data explained by each variable. The estimate for each variable is similar to taking the average of the correlations between the variable and the intensities of each probe on the microarray. Correlation averages are vulnerable to technical artifacts such as stochastic noise of probes in regions with little or no methylation so Eigen-R2 uses principal component analysis to reduce the contribution of these and other problematic probes. Following Eigen-R2 analysis, we adjusted for significant covariates, including history of adversity (5.4%), PMI (2.1%), substance comorbidity (1.7%) and age (1.7%).

An individual probe was called differentially methylated if the p-value of its t-statistic was at most 0.01 (uncorrected for multiple testing) and the associated difference of means between the groups was at least 0.5. Given that the DNA samples were sonicated prior to hybridization, we assumed that probes within 500bp should approximately agree. Therefore, we partitioned the genome into regions of 1000bp and calculated the significance of enrichment for high or low t-statistics of probes within each region (containing at least 1 probe). Significance was determined using the Wilcoxon rank-sum test comparing t-statistics of the probes within the region against those of all the probes on the microarray and then adjusted to obtain false discovery rates for each region. A probe was then called differentially methylated if it satisfied both of the following:

- it was called differentially methylated (i.e. the significance of its t-statistic was at most 0.01 and the difference of means between the groups was at least 0.5), and
- it belonged to a region whose false discovery rate(21) was at most 0.1.

A promoter was called differentially methylated if it contained a probe called differentially methylated.

Methylation and expression differences were summarized across all genes within 1Mb partitions of the genome in order to estimate correlation between expression and methylation differences genome-wide. Methylation summaries were obtained by first computing a z-score for each promoter (2000 to +400bp with respect to the transcription start site) to indicate the enrichment of differentially methylated probes within the

promoter. The z-score summarizes the modified t-statistics of the probes in the promoter obtained from the differential analysis using limma Stouffer's method(22):  $\sum_{i=1}^k t_i/\sqrt{k}$  where k is the number of probes in the promoter. Strictly speaking, Stouffer's method requires z-scores but t-statistics are a reasonable approximation when they come from t-tests involving a large number of samples (in our case 40). We then computed a z-score for each 1Mb region from Wilcoxon rank-sum statistics obtained by comparing z-scores of promoters within the region to those across the entire genome.

### **Expression microarray data**

Microarray gene expression profiles were previously generated by our group(23). Gene expression arrays were available for several but not all of the individuals included in the methylation array study. Specifically, we have expression profiles for 9 controls and 13 suicides individuals of those included in this study. No significant difference in age (suicide:  $30.9 \pm 2.3$ , CTRL:  $37.4 \pm 4.2$ ;  $t = 1.5$ ,  $p = 0.15$ ), pH (suicide:  $6.6 \pm 0.1$ , CTRL:  $6.7 \pm 0.1$ ;  $t = 1.0$ ,  $p = 0.32$ ) and PMI (suicide:  $23.2 \pm 1.9$ , CTRL:  $27.8 \pm 3.2$ ;  $t = -1.3$ ,  $p = 0.21$ ) were found between groups. Expression data was normalized as previously described(23), and expression differences were obtained using linear models implemented in the 'limma' package(18) of Bioconductor(19) yielding a modified t-statistic for each probeset. As with the methylation microarray analysis, models were adjusted for history of adversity, PMI, substance comorbidity, and age. Expression differences were summarized across 1Mb partitions of the genome by computing z-scores from Wilcoxon rank-sum statistics obtained by comparing promoter differential t-statistics within the region to those across the entire genome.

### **Fluorescence-Assisted Cell Sorting (FACS) of Neuronal and Non-Neuronal Nuclei**

Nuclei were isolated from hippocampal tissue as described previously(24). Briefly, 150mg of tissue was thawed and dounced for one minute. Nuclei were then extracted by ultracentrifugation on a sucrose gradient (80%) for 2.5h at 24 000 RPM. Pelleted nuclei were resuspended and incubated with monoclonal human anti-NeuN (1:4000; Abcam), fluorescent Alexa488-labeled goat anti-mouse (1:4000; Invitrogen), blocking solution (10% BSA in normal goat serum) and 1X PBS for 1 hour at 4°C on a rotating wheel. Nuclei were then filtered and sorted on a FACSVantage SE system (BD Bioscience, San Jose CA). Sorting specificity was assessed using an Olympus BX51 microscope with motorized stage under a 40X 0.75 NA UPlan FL N objective using both pre-sorted and sorted fractions (data not shown). Neuronal and non-neuronal nuclei were coverslipped with Vectashield containing DAPI (1:4 with DAPI-free Vectashield) (Vector Lab). Sorted nuclei were pelleted by centrifugation in a sucrose solution (20%) for 15 minutes at 3 000 RPM. For subsequent DNA extraction, nuclei were first lysed at 56°C for 10 minutes in a solution containing EDTA (50mM), proteinase QIAGEN protease (1 unit) and 10% Sodium Dodecyl Sulfate (SDS). DNA was then purified using the DNAeasy extraction kit (QIAGEN). Concentration and quality of DNA was assessed on Nanodrop.

### **DNA Bisulfite treatment and EpiTyper**

Neuronal and non-neuronal DNA fractions extracted from FACS-sorted nuclei were treated with sodium bisulfite (Na-BIS) using the EpiTech Bisulfite kit (QIA). BIS DNA was then sent to the Innovation Center of Genome Quebec, where EpiTyper(25) was performed. Results were analyzed by two way-mixed model ANOVA with groups as a

fixed factor and CpGs as a repeated measure followed by LSD post-hoc tests. Level of significance was fixed at 0.05.

## Supplementary Results

*CHRNA2* A region of 451 bp, including 28 CpGs, was assessed in the promoter of *CHRNA2* gene (chr1:154,539,946 to 154,540,386). Of this region, the first 312 bp (19 CpGs) are located in the promoter while the last 139 bp (9 CpGs) span the first exon. In the neuronal fraction, mixed-model ANOVA revealed a significant hypermethylation in suicides compared to CTRLs ( $F_{(1,136)}=5.36$ ,  $p<0.05$ ; Figure S1B). Post hoc analyses revealed a significant hypermethylation in suicides compared to CTRLs at CpGs sites 1 ( $p<0.05$ ), 2 ( $p<0.005$ ) and 10,11 ( $p<0.05$ ) (Figure S1A). In the non-neuronal fraction, mixed-model ANOVA revealed a significant overall hypomethylation in suicides compared to CTRLs ( $F_{(1,188)}=4.10$ ,  $p<0.05$ ; Figure S1D), post-hoc analysis showing a significant hypomethylation in suicides compared to CTRLs at CpG site 2 ( $p<0.0005$ ) (Figure S1C).

*CHRNA2* gene expression analyses suggested a trend toward a significant down-regulation of *CHRNA2* expression in the brain of suicide completers compared to CTRLs ( $F_{(1,47)}=2.53$ ,  $p=0.06$ ; Figure S4A), and therefore, a possible effect of *CHRNA2* promoter methylation in the neuronal cell fraction on gene expression. However, there was no significant correlation between expression and methylation (neuronal and non neuronal) data.

*GRM7* A region of 179 bp located 367 bp upstream from the TSS including 12 CpGs was assessed in the promoter of the *GRM7* gene (chr3:6,902,436 to 6,902,613). A trend toward hypermethylation in suicides was found in the neuronal fraction (mixed-model ANOVA  $F_{(1,131)}=2.34$ ,  $p=0.064$ ; Figure S2B), while a significant hypomethylation was found in the non-neuronal fraction of suicides compared to CTRL (mixed-model ANOVA  $F_{(1,203)}=2.81$ ,  $p<0.05$ ; Figure S2D). Post-hoc analyses in the neuronal fraction revealed no site specific difference (Figure S2A) while in the non-neuronal fraction it showed significant hypomethylation at CpGs sites 5 ( $p<0.0005$ ) and 12 ( $p<0.05$ ) in suicides compared to CTRLs (Figure S2C).

Our data revealed a significant decrease in *GRM7* expression in the hippocampus of suicide completers compared to CTRLs ( $F_{(1,49)}=10.81$ ,  $p<0.005$ ; Figure S4B), suggesting a possible relationship between changes in promoter DNA methylation patterns in the neuronal cell fraction and *GRM7* expression in suicide completers. We found no significant correlation between expression and methylation (neuronal and non neuronal) data.

*DBH* A region of 329 bp containing 17 CpGs located 24 bp downstream from the TSS within the first exon was assessed in *DBH* gene (chr9:136,501,510 to 136,501,877)). In the neuronal fraction, we found a trend toward a significant hypermethylation in suicides compared to CTRLs (mixed-model ANOVA  $F_{(1,101)}=2.27$ ,  $p=0.067$ ; Figure S3B), with post-hoc analyses showing a trend for a significant hypermethylation in suicides compared to CTRLs at CpG sites 5,6 ( $p=0.076$ ), and 14 ( $p=0.073$ ) (Figure S3A). No

mean or site-specific methylation difference was found between suicides and CTRLs in the non-neuronal fraction (Figure S3C-D). Our analysis revealed no significant changes in gene expression between suicides and CTRLs (Figure S4C).

**TABLE S1. Sample information**

|                       | <b>Suicide</b>                                                                                                                                   | <b>Control</b>                   |
|-----------------------|--------------------------------------------------------------------------------------------------------------------------------------------------|----------------------------------|
| <b>Sexe (M/F)</b>     | 46/0                                                                                                                                             | 16/0                             |
| <b>Age</b>            | 38.8±11.4                                                                                                                                        | 40.9±14.3                        |
| <b>pH</b>             | 6.6±0.3                                                                                                                                          | 6.5±0.3                          |
| <b>PMI</b>            | 31.3±14.2                                                                                                                                        | 32.6±15.1                        |
| <b>RIN</b>            | 6.23±0.6                                                                                                                                         | 6.48±0.6                         |
| <b>Cause of death</b> | Hanging: 63% (n=29)<br>Drowning: 2% (n=1)<br>Shooting: 2% (n=1)<br>Intoxication: 26% (n=12)<br>Jumping: 4% (n=2)<br>Cutting: 2% (n=1)            | Accidental death:100%<br>(n =16) |
| <b>DSM-IV</b>         | Major Depression: 56% (n=26)<br>Substance Dependence: 15% (n=7)<br>Bipolar Disorder: 13% (n=6)<br>Psychotic Disorders: 7% (n=3)<br>NIL: 9% (n=4) | NIL:100% (n=16)                  |
| <b>Medication</b>     | 15% (n=7)                                                                                                                                        | 0% (n=0)                         |

Mean±SD

**TABLE S2. List of genes differentially methylated rank by corrected p-value (q-value).**

| Hypermethylated Probes in Suicides |                       |         |      |             |      |         |
|------------------------------------|-----------------------|---------|------|-------------|------|---------|
| CHRM                               | CH <sub>3</sub> Level | q-value | LFC  | Gene Name   | TSS  | Group   |
| 7                                  | 1,00                  | 3,2E-03 | 1,10 | MUC3A       | 638  | suicide |
| 17                                 | 0,95                  | 3,7E-03 | 1,48 | KCNJ12      | 466  | suicide |
| 17                                 | 0,95                  | 3,7E-03 | 1,29 | KCNJ12      | 444  | suicide |
| 17                                 | 0,96                  | 3,7E-03 | 1,05 | KCNJ12      | 379  | suicide |
| 14                                 | 1,00                  | 3,7E-03 | 1,32 | SYNE2       | NA   | suicide |
| 10                                 | 0,62                  | 4,3E-03 | 0,92 | SYNPO2L     | 298  | suicide |
| 1                                  | 0,88                  | 4,6E-03 | 1,19 | RPS6KA1     | 800  | suicide |
| 1                                  | 0,88                  | 4,6E-03 | 0,74 | RPS6KA1     | 253  | suicide |
| 1                                  | 0,90                  | 5,3E-03 | 1,08 | HIST2H2AB   | 1113 | suicide |
| 1                                  | 0,90                  | 5,3E-03 | 0,95 | HIST2H2AB   | 1074 | suicide |
| 2                                  | 0,28                  | 5,4E-03 | 1,14 | MIR10B      | -96  | suicide |
| 19                                 | 0,91                  | 5,4E-03 | 0,97 | JUNB        | 468  | suicide |
| 11                                 | NA                    | 5,7E-03 | 0,91 | SNX32       | 1060 | suicide |
| 15                                 | 0,98                  | 5,8E-03 | 1,03 | SNORD115-14 | 319  | suicide |
| 8                                  | 0,90                  | 6,3E-03 | 0,98 | C8orf45     | -50  | suicide |
| 8                                  | 0,96                  | 6,3E-03 | 0,94 | C8orf45     | 97   | suicide |
| 8                                  | 0,96                  | 6,3E-03 | 0,92 | C8orf45     | 23   | suicide |
| 1                                  | 0,70                  | 6,6E-03 | 1,39 | SLC6A17     | 297  | suicide |
| 17                                 | 0,93                  | 6,9E-03 | 1,10 | CNP         | 1029 | suicide |
| 2                                  | 0,91                  | 6,9E-03 | 1,14 | ASB3        | 114  | suicide |
| 2                                  | 0,91                  | 6,9E-03 | 0,81 | ASB3        | 132  | suicide |
| 2                                  | 0,61                  | 7,1E-03 | 1,09 | PRPF40A     | -268 | suicide |
| 2                                  | 0,41                  | 7,1E-03 | 0,84 | PRPF40A     | -487 | suicide |
| 13                                 | 0,98                  | 7,3E-03 | 0,83 | F10         | 748  | suicide |
| 1                                  | 0,66                  | 7,6E-03 | 1,36 | S100A6      | 666  | suicide |
| 1                                  | 0,13                  | 7,7E-03 | 1,16 | DEDD        | 358  | suicide |
| 13                                 | 0,98                  | 8,2E-03 | 1,32 | HTR2A       | 2021 | suicide |
| 19                                 | 0,51                  | 9,2E-03 | 1,36 | TFPT        | 46   | suicide |
| 17                                 | 0,20                  | 9,8E-03 | 0,93 | FTSJ3       | 51   | suicide |
| 17                                 | 0,78                  | 1,1E-02 | 1,04 | CACNG4      | 857  | suicide |
| 4                                  | 0,99                  | 1,1E-02 | 1,10 | SCARNA22    | 821  | suicide |
| 19                                 | 0,95                  | 1,1E-02 | 1,17 | SNORA68     | 1053 | suicide |
| 19                                 | 0,88                  | 1,1E-02 | 0,92 | SNORA68     | 926  | suicide |
| 3                                  | 0,70                  | 1,1E-02 | 1,01 | CYB561D2    | -265 | suicide |
| 1                                  | 0,90                  | 1,1E-02 | 0,88 | PMF1        | 731  | suicide |
| 1                                  | 0,83                  | 1,1E-02 | 0,88 | ARTN        | NA   | suicide |
| 16                                 | 0,34                  | 1,2E-02 | 0,87 | ALDOA       | -389 | suicide |
| 15                                 | 0,96                  | 1,2E-02 | 1,14 | SNORD115-41 | -896 | suicide |
| 16                                 | 0,62                  | 1,3E-02 | 0,82 | FHOD1       | 612  | suicide |
| 13                                 | 1,00                  | 1,3E-02 | 0,85 | SLC15A1     | 977  | suicide |
| 6                                  | 0,49                  | 1,3E-02 | 1,38 | NR2E1       | 955  | suicide |
| 12                                 | 0,76                  | 1,6E-02 | 0,98 | SNORD59B    | 457  | suicide |
| 12                                 | 0,57                  | 1,6E-02 | 0,83 | SNORD59B    | -56  | suicide |
| 3                                  | 0,63                  | 1,6E-02 | 1,00 | GRM7        | 953  | suicide |
| 19                                 | 0,57                  | 1,6E-02 | 1,25 | BCL2L12     | -54  | suicide |
| 1                                  | 0,73                  | 1,6E-02 | 0,85 | GPR3        | 982  | suicide |



|    |      |         |      |             |      |         |
|----|------|---------|------|-------------|------|---------|
| 10 | 0,30 | 1,6E-02 | 1,07 | NCRNA00081  | -157 | suicide |
| 10 | 0,61 | 1,7E-02 | 1,01 | ELOVL3      | 444  | suicide |
| 1  | 0,90 | 1,7E-02 | 1,07 | DEDD        | 1188 | suicide |
| 8  | 0,88 | 1,7E-02 | 0,91 | FAM49B      | 974  | suicide |
| 20 | 0,87 | 1,8E-02 | 1,35 | SS18L1      | -110 | suicide |
| 11 | 0,61 | 1,8E-02 | 0,95 | SNORD31     | -150 | suicide |
| 15 | 0,85 | 1,8E-02 | 1,08 | HDC         | -144 | suicide |
| 19 | 0,40 | 1,8E-02 | 1,05 | TRIP10      | 270  | suicide |
| 17 | 0,76 | 1,9E-02 | 0,88 | SENP3       | 980  | suicide |
| 14 | 0,85 | 1,9E-02 | 1,05 | C14orf119   | 325  | suicide |
| 14 | 0,56 | 1,9E-02 | 1,11 | METT11D1    | 516  | suicide |
| 6  | 0,88 | 1,9E-02 | 1,25 | VTA1        | 1057 | suicide |
| 21 | 0,99 | 1,9E-02 | 1,28 | UMODL1      | 1132 | suicide |
| 8  | 1,00 | 2,0E-02 | 1,13 | FAM49B      | 1171 | suicide |
| 10 | 1,00 | 2,0E-02 | 1,13 | C10orf57    | -67  | suicide |
| 7  | 0,92 | 2,0E-02 | 1,15 | TSPAN33     | 1183 | suicide |
| 14 | 0,66 | 2,0E-02 | 0,97 | AKT1        | 443  | suicide |
| 8  | 0,49 | 2,0E-02 | 0,84 | MOS         | 715  | suicide |
| 7  | 0,42 | 2,0E-02 | 0,81 | ARMC10      | -494 | suicide |
| X  | 0,73 | 2,0E-02 | 0,77 | NGFRAP1     | 775  | suicide |
| 12 | 0,47 | 2,1E-02 | 0,61 | EMG1        | 77   | suicide |
| 11 | NA   | 2,1E-02 | 0,93 | OR2D3       | -171 | suicide |
| 2  | 0,98 | 2,1E-02 | 1,11 | LIMS2       | 621  | suicide |
| 6  | 0,67 | 2,1E-02 | 1,39 | ME1         | 555  | suicide |
| 2  | 0,65 | 2,1E-02 | 1,36 | NEUROD1     | 635  | suicide |
| 6  | 0,67 | 2,1E-02 | 1,05 | ME1         | 572  | suicide |
| 6  | 0,72 | 2,1E-02 | 1,09 | ME1         | 492  | suicide |
| 14 | 0,26 | 2,1E-02 | 1,05 | ATG2B       | -926 | suicide |
| 11 | 0,75 | 2,1E-02 | 1,58 | ZNF259      | 945  | suicide |
| 22 | 0,87 | 2,1E-02 | 0,89 | CTA-299D3.8 | 835  | suicide |
| 12 | 0,39 | 2,2E-02 | 1,14 | DYRK2       | 1132 | suicide |
| 6  | 0,83 | 2,2E-02 | 1,07 | TTBK1       | -93  | suicide |
| 21 | 0,67 | 2,3E-02 | 0,99 | GABPA       | 563  | suicide |
| 11 | 0,99 | 2,3E-02 | 1,23 | NDUFS8      | 949  | suicide |
| 1  | 0,98 | 2,3E-02 | 1,04 | MIR555      | 1255 | suicide |
| 1  | 0,98 | 2,3E-02 | 1,08 | MIR555      | 1254 | suicide |
| 14 | 0,52 | 2,3E-02 | 1,12 | SFRS5       | -86  | suicide |
| 1  | 1,00 | 2,3E-02 | 1,28 | GOS2        | NA   | suicide |
| 1  | 0,94 | 2,4E-02 | 1,10 | ARHGEF2     | 150  | suicide |
| 12 | 0,86 | 2,5E-02 | 1,08 | MSI1        | NA   | suicide |
| 9  | 0,97 | 2,6E-02 | 1,13 | NPDC1       | -767 | suicide |
| 12 | 1,00 | 2,6E-02 | 1,20 | ARHGAP9     | -555 | suicide |
| 17 | 0,93 | 2,6E-02 | 1,20 | C17orf84    | 826  | suicide |
| 11 | 0,91 | 2,6E-02 | 1,13 | NRGN        | 600  | suicide |
| 14 | 0,31 | 2,6E-02 | 1,03 | NEK9        | 276  | suicide |
| 17 | 0,57 | 2,6E-02 | 0,86 | FLOT2       | 544  | suicide |
| 2  | 0,39 | 2,6E-02 | 1,01 | HOXD13      | 896  | suicide |
| 12 | 0,93 | 2,7E-02 | 0,83 | IFNG        | 4408 | suicide |

|    |      |         |      |            |       |         |
|----|------|---------|------|------------|-------|---------|
| 12 | 0,95 | 2,7E-02 | 0,91 | IFNG       | 4394  | suicide |
| 1  | 0,94 | 2,7E-02 | 1,17 | GUK1       | 644   | suicide |
| 22 | 0,90 | 2,7E-02 | 1,10 | LGALS2     | -89   | suicide |
| 16 | 0,90 | 2,7E-02 | 1,24 | NAT15      | -262  | suicide |
| 19 | 0,95 | 2,8E-02 | 0,91 | KLK12      | 125   | suicide |
| 19 | 0,70 | 2,9E-02 | 1,20 | BBC3       | 535   | suicide |
| 12 | 0,93 | 2,9E-02 | 1,42 | ACCN2      | 1175  | suicide |
| 20 | 1,00 | 2,9E-02 | 1,10 | SNORD119   | 1066  | suicide |
| 7  | 0,35 | 3,0E-02 | 1,32 | PTPRZ1     | 521   | suicide |
| 1  | 0,27 | 3,1E-02 | 0,86 | TAF5L      | -518  | suicide |
| 5  | 0,65 | 3,1E-02 | 1,00 | CDX1       | 567   | suicide |
| 14 | 1,00 | 3,1E-02 | 1,20 | SYNE2      | -86   | suicide |
| 20 | 0,76 | 3,1E-02 | 1,16 | PHACTR3    | 774   | suicide |
| 20 | 0,93 | 3,1E-02 | 1,09 | PHACTR3    | 853   | suicide |
| X  | 0,29 | 3,2E-02 | 0,84 | PQBP1      | -72   | suicide |
| 11 | 0,96 | 3,2E-02 | 1,11 | BSCL2      | -636  | suicide |
| 19 | 0,91 | 3,3E-02 | 1,11 | SNORD37    | 992   | suicide |
| 11 | 1,00 | 3,4E-02 | 1,01 | OR2AG2     | 847   | suicide |
| 11 | 0,76 | 3,4E-02 | 1,10 | PRCP       | 196   | suicide |
| 21 | 0,97 | 3,4E-02 | 1,30 | USP25      | 926   | suicide |
| 1  | 0,71 | 3,5E-02 | 1,15 | CHRN2      | 681   | suicide |
| 1  | 1,00 | 3,5E-02 | 1,06 | AC096643.1 | 602   | suicide |
| 14 | 0,89 | 3,5E-02 | 0,93 | C14orf34   | NA    | suicide |
| 7  | 0,75 | 3,5E-02 | 1,04 | CCDC136    | 161   | suicide |
| 8  | 0,55 | 3,6E-02 | 1,18 | NEIL2      | 714   | suicide |
| 3  | 0,69 | 3,6E-02 | 0,95 | MIR425     | -788  | suicide |
| 10 | 0,51 | 3,6E-02 | 1,02 | ZCHC24     | 523   | suicide |
| 2  | 0,31 | 3,6E-02 | 1,19 | SLC25A12   | 548   | suicide |
| 11 | 0,66 | 3,7E-02 | 0,98 | APLP2      | 927   | suicide |
| 20 | 0,72 | 3,7E-02 | 1,36 | E2F1       | 405   | suicide |
| 12 | 0,60 | 3,7E-02 | 0,91 | NUAK1      | 518   | suicide |
| 12 | 0,60 | 3,7E-02 | 1,05 | NUAK1      | 511   | suicide |
| 2  | 0,84 | 3,7E-02 | 1,09 | LOC150935  | 1118  | suicide |
| 22 | 0,90 | 3,8E-02 | 1,07 | ARVCF      | -1576 | suicide |
| 17 | 0,91 | 3,8E-02 | 1,45 | BCAS3      | -364  | suicide |
| 3  | 0,24 | 3,8E-02 | 0,95 | DLEC1      | 113   | suicide |
| 3  | 0,34 | 3,8E-02 | 0,99 | DLEC1      | -54   | suicide |
| 3  | 0,58 | 3,8E-02 | 0,84 | FBXO45     | -844  | suicide |
| 1  | 1,00 | 3,8E-02 | 1,25 | SYTL1      | -549  | suicide |
| 13 | 0,76 | 3,9E-02 | 1,17 | POMP       | 1229  | suicide |
| 13 | 0,80 | 3,9E-02 | 0,90 | POMP       | 896   | suicide |
| 6  | NA   | 3,9E-02 | 1,16 | GJA1       | 630   | suicide |
| 6  | NA   | 3,9E-02 | 0,95 | GJA1       | 465   | suicide |
| 6  | NA   | 3,9E-02 | 1,01 | GJA1       | 604   | suicide |
| 16 | 0,59 | 3,9E-02 | 1,18 | C16orf45   | 357   | suicide |
| 14 | 0,88 | 4,0E-02 | 1,39 | ZFYVE21    | 664   | suicide |
| 18 | 0,87 | 4,0E-02 | 1,01 | RAB31      | 1218  | suicide |
| 18 | 0,90 | 4,0E-02 | 1,08 | RAB31      | 1183  | suicide |

|    |      |         |      |             |       |         |
|----|------|---------|------|-------------|-------|---------|
| 5  | 0,29 | 4,0E-02 | 0,97 | MRPL22      | 73    | suicide |
| 12 | 0,99 | 4,0E-02 | 0,97 | KRT75       | 352   | suicide |
| 9  | 0,63 | 4,1E-02 | 1,49 | C8G         | 149   | suicide |
| 5  | 0,85 | 4,1E-02 | 1,04 | SNORA47     | 28    | suicide |
| 15 | 0,86 | 4,1E-02 | 1,21 | SNORD115-23 | 920   | suicide |
| 15 | 0,86 | 4,1E-02 | 1,07 | SNORD115-22 | -833  | suicide |
| 15 | 0,77 | 4,2E-02 | 0,88 | SNORD115-7  | -49   | suicide |
| 14 | 0,45 | 4,2E-02 | 1,16 | SFRS5       | 622   | suicide |
| 17 | 0,83 | 4,2E-02 | 0,76 | C17orf107   | 1034  | suicide |
| 3  | 1,00 | 4,3E-02 | 1,24 | U73167.7    | -534  | suicide |
| 8  | 0,70 | 4,3E-02 | 1,15 | PTDSS1      | -798  | suicide |
| 8  | 0,70 | 4,3E-02 | 1,26 | PTDSS1      | -778  | suicide |
| X  | 0,62 | 4,3E-02 | 1,20 | TFDP3       | 682   | suicide |
| 10 | 0,37 | 4,4E-02 | 0,87 | GFRA1       | 358   | suicide |
| 19 | 0,84 | 4,4E-02 | 1,03 | CYP2B7P1    | NA    | suicide |
| 17 | 0,63 | 4,5E-02 | 0,91 | SMCR8       | -545  | suicide |
| 1  | 0,63 | 4,5E-02 | 0,88 | ILDR2       | 1179  | suicide |
| 7  | 1,00 | 4,5E-02 | 1,02 | WIPF3       | 969   | suicide |
| X  | 0,97 | 4,5E-02 | 1,49 | KLHL34      | 1002  | suicide |
| X  | 0,91 | 4,5E-02 | 1,32 | KLHL34      | 921   | suicide |
| X  | 1,00 | 4,5E-02 | 1,05 | KLHL34      | 1068  | suicide |
| 12 | 0,13 | 4,5E-02 | 1,36 | MCRS1       | 205   | suicide |
| 12 | 0,13 | 4,5E-02 | 0,89 | MCRS1       | 152   | suicide |
| 2  | 0,10 | 4,7E-02 | 1,04 | PLCL1       | 457   | suicide |
| 19 | 1,00 | 4,7E-02 | 1,19 | MUC16       | 793   | suicide |
| 19 | 0,82 | 4,7E-02 | 1,18 | MED29       | -1052 | suicide |
| 9  | 0,80 | 4,7E-02 | 1,22 | MSMP        | 1101  | suicide |
| 15 | 0,87 | 4,7E-02 | 1,17 | PKM2        | 467   | suicide |
| X  | 0,53 | 4,7E-02 | 0,97 | RBM3        | 482   | suicide |
| 8  | 0,95 | 4,8E-02 | 0,93 | C8orf74     | 993   | suicide |
| 18 | 0,41 | 5,0E-02 | 0,96 | C18orf54    | 432   | suicide |
| 13 | 0,45 | 5,0E-02 | 1,22 | EDNRB       | 125   | suicide |
| 1  | 0,77 | 5,2E-02 | 0,74 | RNASL       | 1142  | suicide |
| 20 | 0,90 | 5,2E-02 | 0,75 | SGK2        | 1297  | suicide |
| 9  | 0,96 | 5,2E-02 | 1,00 | ATP8B5P     | NA    | suicide |
| 3  | 0,84 | 5,2E-02 | 0,88 | TNNC1       | 220   | suicide |
| 11 | 1,00 | 5,3E-02 | 1,30 | CALCB       | 1022  | suicide |
| 3  | 0,93 | 5,3E-02 | 0,98 | RFT1        | 812   | suicide |
| 12 | 0,80 | 5,3E-02 | 0,92 | GPR133      | 464   | suicide |
| 9  | 0,71 | 5,4E-02 | 1,19 | AKAP2       | 425   | suicide |
| X  | 0,89 | 5,4E-02 | 0,88 | HMGB3       | 1153  | suicide |
| 14 | 0,25 | 5,5E-02 | 1,14 | HOMEZ       | 335   | suicide |
| 7  | 0,95 | 5,5E-02 | 0,81 | BET1        | 353   | suicide |
| 22 | 0,97 | 5,5E-02 | 1,09 | PRAME       | 149   | suicide |
| 6  | 0,85 | 5,6E-02 | 0,97 | RIMS1       | 499   | suicide |
| X  | 0,92 | 5,6E-02 | 1,27 | CTPS2       | 963   | suicide |
| 17 | 0,85 | 5,6E-02 | 0,96 | PCTP        | 674   | suicide |
| 1  | 0,87 | 5,6E-02 | 0,84 | ADORA1      | 297   | suicide |

|    |      |         |      |            |       |         |
|----|------|---------|------|------------|-------|---------|
| 5  | 0,20 | 5,7E-02 | 1,22 | AC004507.1 | -62   | suicide |
| 5  | 0,20 | 5,7E-02 | 0,97 | AC004507.1 | -71   | suicide |
| 7  | 0,86 | 5,7E-02 | 1,00 | NPC1L1     | 58    | suicide |
| 15 | 1,00 | 5,7E-02 | 0,97 | BMF        | 145   | suicide |
| X  | 0,79 | 5,8E-02 | 1,38 | USP27X     | -581  | suicide |
| 17 | 0,62 | 5,9E-02 | 0,87 | MSL1       | -790  | suicide |
| 1  | 0,77 | 5,9E-02 | 1,02 | TTC4       | 984   | suicide |
| 7  | 0,74 | 5,9E-02 | 1,13 | ACCN3      | 436   | suicide |
| 7  | 0,74 | 5,9E-02 | 1,05 | ACCN3      | 414   | suicide |
| 17 | 1,00 | 5,9E-02 | 1,12 | MIR497     | 781   | suicide |
| 17 | 0,92 | 6,0E-02 | 0,98 | NME1-NME2  | 14    | suicide |
| 1  | 0,64 | 6,0E-02 | 1,26 | EIF2C1     | 453   | suicide |
| 9  | 0,95 | 6,0E-02 | 1,21 | DBH        | 173   | suicide |
| 19 | 0,73 | 6,0E-02 | 1,11 | TOMM40     | 684   | suicide |
| 7  | 0,84 | 6,1E-02 | 0,97 | ADCY1      | 419   | suicide |
| 9  | 0,65 | 6,2E-02 | 1,50 | DOCK8      | 578   | suicide |
| 10 | 0,97 | 6,2E-02 | 1,15 | PAPSS2     | 446   | suicide |
| X  | 0,92 | 6,2E-02 | 0,97 | OCRL       | 99    | suicide |
| 20 | 0,64 | 6,3E-02 | 0,92 | FAM110A    | NA    | suicide |
| X  | 0,94 | 6,3E-02 | 1,09 | DDX53      | -116  | suicide |
| 1  | 0,90 | 6,3E-02 | 1,44 | CD58       | 1213  | suicide |
| 19 | 0,95 | 6,4E-02 | 1,04 | SHANK1     | 1097  | suicide |
| 9  | 0,25 | 6,4E-02 | 1,32 | CENPP      | 46    | suicide |
| 17 | 0,82 | 6,4E-02 | 0,81 | WFIKKN2    | 306   | suicide |
| 17 | 0,84 | 6,5E-02 | 1,19 | LYZL6      | 68    | suicide |
| 4  | 0,73 | 6,5E-02 | 1,08 | CHIC2      | 925   | suicide |
| 8  | 1,00 | 6,6E-02 | 1,39 | C8orf71    | 1208  | suicide |
| 8  | 1,00 | 6,6E-02 | 1,22 | C8orf71    | 1223  | suicide |
| 2  | 0,89 | 6,6E-02 | 1,11 | SH2D6      | 460   | suicide |
| 17 | 0,62 | 6,7E-02 | 0,99 | RPL19      | 996   | suicide |
| 11 | 0,89 | 6,7E-02 | 0,83 | OMP        | NA    | suicide |
| 8  | 0,24 | 6,7E-02 | 0,95 | ADCY8      | 618   | suicide |
| 8  | 0,24 | 6,7E-02 | 0,88 | ADCY8      | 612   | suicide |
| 14 | 0,88 | 6,8E-02 | 0,95 | KCNK10     | 298   | suicide |
| 13 | 0,90 | 6,8E-02 | 0,82 | STK24      | 1313  | suicide |
| 14 | 0,41 | 6,9E-02 | 1,21 | GLRX5      | -1049 | suicide |
| 2  | 0,68 | 7,0E-02 | 0,82 | SCLY       | 589   | suicide |
| 22 | 1,00 | 7,1E-02 | 1,07 | TMPRSS6    | 387   | suicide |
| 3  | 0,36 | 7,1E-02 | 0,91 | TOPBP1     | NA    | suicide |
| 19 | 0,96 | 7,2E-02 | 0,95 | DAND5      | 310   | suicide |
| 1  | 0,67 | 7,2E-02 | 1,22 | OR13G1     | 39    | suicide |
| 1  | 0,67 | 7,2E-02 | 0,90 | OR13G1     | 23    | suicide |
| 15 | 0,77 | 7,2E-02 | 1,07 | BTBD1      | 721   | suicide |
| 13 | 0,48 | 7,3E-02 | 1,14 | RNF6       | -147  | suicide |
| 22 | 0,92 | 7,3E-02 | 1,23 | GSTTP2     | 539   | suicide |
| 16 | 0,78 | 7,3E-02 | 0,93 | NTN3       | 796   | suicide |
| 17 | 0,83 | 7,4E-02 | 0,92 | NACA2      | NA    | suicide |
| X  | 0,94 | 7,4E-02 | 1,01 | ZNF185     | 1070  | suicide |

| 9                                 | 0,85                  | 7,6E-02 | 1,09  | C9orf91     | 592   | suicide |
|-----------------------------------|-----------------------|---------|-------|-------------|-------|---------|
| 1                                 | 0,41                  | 7,7E-02 | 1,09  | ATP8B2      | 462   | suicide |
| X                                 | 0,11                  | 7,7E-02 | 1,23  | RBMX        | -723  | suicide |
| 19                                | 0,62                  | 7,7E-02 | 0,89  | PNMAL2      | 1142  | suicide |
| 10                                | 0,56                  | 7,8E-02 | 0,93  | TCF7L2      | -75   | suicide |
| 12                                | 0,70                  | 7,8E-02 | 0,84  | PHC1B       | -694  | suicide |
| 12                                | 0,78                  | 7,8E-02 | 0,84  | PHC1B       | -845  | suicide |
| 5                                 | 0,91                  | 7,8E-02 | 0,76  | PCDHGA6     | NA    | suicide |
| 2                                 | 0,17                  | 7,9E-02 | 1,29  | HADHA       | -403  | suicide |
| 2                                 | 0,94                  | 8,0E-02 | 1,40  | UGT1A9      | 567   | suicide |
| 2                                 | 1,00                  | 8,0E-02 | 1,11  | UGT1A9      | 670   | suicide |
| 1                                 | 0,16                  | 8,0E-02 | 0,92  | JUN         | NA    | suicide |
| X                                 | 0,69                  | 8,1E-02 | 1,01  | SLC16A2     | -404  | suicide |
| 3                                 | 0,82                  | 8,2E-02 | 1,20  | SST         | 223   | suicide |
| 20                                | 0,92                  | 8,2E-02 | 1,06  | OGFR        | 261   | suicide |
| 19                                | 0,23                  | 8,3E-02 | 1,12  | AKT1S1      | -414  | suicide |
| 6                                 | 0,37                  | 8,3E-02 | 0,90  | ZNF184      | -183  | suicide |
| 6                                 | 0,38                  | 8,3E-02 | 1,13  | ECHDC1      | 72    | suicide |
| 10                                | 0,81                  | 8,4E-02 | 1,00  | DUSP13      | 415   | suicide |
| 22                                | 1,00                  | 8,5E-02 | 0,83  | TMPRSS6     | 318   | suicide |
| 13                                | 0,90                  | 8,7E-02 | 1,11  | GAS6        | -179  | suicide |
| 16                                | 0,77                  | 8,8E-02 | 1,11  | DPEP2       | 788   | suicide |
| 17                                | 0,81                  | 8,8E-02 | 1,40  | SLC6A4      | NA    | suicide |
| 9                                 | 0,21                  | 8,8E-02 | 1,25  | WDR31       | 482   | suicide |
| 14                                | 0,92                  | 8,9E-02 | 1,15  | C14orf180   | 1139  | suicide |
| 6                                 | 1,00                  | 8,9E-02 | 1,15  | DDO         | 1102  | suicide |
| 22                                | 0,98                  | 9,0E-02 | 1,08  | SYNGR1      | 530   | suicide |
| 1                                 | 0,22                  | 9,4E-02 | 0,96  | GGPS1       | 2     | suicide |
| 2                                 | 0,97                  | 9,4E-02 | 1,23  | ANKMY1      | -2108 | suicide |
| 3                                 | 0,99                  | 9,4E-02 | 1,11  | GP5         | -219  | suicide |
| 3                                 | 1,00                  | 9,4E-02 | 0,98  | GP5         | -122  | suicide |
| 1                                 | 0,45                  | 9,5E-02 | 1,24  | ANKRD34A    | -41   | suicide |
| 9                                 | 0,69                  | 9,5E-02 | 0,88  | CENPP       | -927  | suicide |
| 22                                | 0,87                  | 9,6E-02 | 0,96  | VPREB3      | -7    | suicide |
| 5                                 | 0,74                  | 9,8E-02 | 0,69  | PCBD2       | -271  | suicide |
| Hypomethylated Probes in Suicides |                       |         |       |             |       |         |
| CHRM                              | CH <sub>3</sub> level | q-value | LFC   | Gene Name   | TSS   | Group   |
| 14                                | 0,62                  | 3,1E-03 | -0,89 | SNORD114-14 | 950   | control |
| 14                                | 0,58                  | 3,1E-03 | -0,86 | SNORD114-14 | 884   | control |
| 12                                | 0,08                  | 3,2E-03 | -0,97 | CLEC12B     | 708   | control |
| 9                                 | 0,78                  | 3,2E-03 | -1,14 | MAPKAP1     | -37   | control |
| 3                                 | 0,63                  | 4,0E-03 | -1,21 | PLCL2       | 320   | control |
| Y                                 | 0,88                  | 7,1E-03 | -1,22 | AMELY       | 211   | control |
| Y                                 | 0,58                  | 7,3E-03 | -0,93 | NLGN4Y      | 765   | control |
| 9                                 | 0,64                  | 7,3E-03 | -0,95 | OR13F1      | 1177  | control |
| 5                                 | 0,29                  | 7,6E-03 | -1,16 | DNAH5       | 820   | control |
| 6                                 | 0,63                  | 7,7E-03 | -0,98 | CLIC5       | 545   | control |
| 10                                | NA                    | 8,0E-03 | -1,47 | A1CF        | 716   | control |

|    |      |         |       |           |       |         |
|----|------|---------|-------|-----------|-------|---------|
| 15 | 0,84 | 1,1E-02 | -0,82 | TGM7      | 549   | control |
| 15 | 1,00 | 1,1E-02 | -0,96 | TGM7      | 429   | control |
| 4  | 0,62 | 1,1E-02 | -1,29 | C4orf21   | 47    | control |
| 18 | 0,77 | 1,4E-02 | -0,82 | MEP1B     | 214   | control |
| 1  | 0,74 | 1,6E-02 | -1,07 | DNAH14    | 1042  | control |
| 13 | 0,72 | 1,8E-02 | -1,59 | POSTN     | 185   | control |
| 5  | 0,52 | 1,8E-02 | -1,09 | PCDHA2    | NA    | control |
| 1  | 0,57 | 2,0E-02 | -1,26 | NRD1      | -8    | control |
| 5  | 0,94 | 2,2E-02 | -0,83 | SPEF2     | -19   | control |
| 14 | 0,94 | 2,3E-02 | -1,02 | CMA1      | -94   | control |
| 4  | 0,44 | 2,3E-02 | -1,02 | PDE5A     | 1098  | control |
| 11 | 0,71 | 2,4E-02 | -0,93 | OR52M1    | 607   | control |
| 3  | 0,73 | 2,6E-02 | -1,09 | SPINK8    | 56    | control |
| 1  | 0,16 | 2,6E-02 | -1,06 | HNRNPU    | 1230  | control |
| 1  | 0,90 | 2,6E-02 | -0,93 | OR2T1     | 33    | control |
| 1  | 0,94 | 2,7E-02 | -1,18 | VAV3      | 1210  | control |
| 12 | 0,62 | 2,8E-02 | -0,93 | OVOS1     | -87   | control |
| 17 | 0,55 | 2,9E-02 | -1,10 | ASPA      | 68    | control |
| 10 | 0,49 | 3,0E-02 | -0,92 | MIR107    | 109   | control |
| 2  | NA   | 3,1E-02 | -0,97 | BX640963  | NA    | control |
| 10 | 0,48 | 3,2E-02 | -1,53 | MIR1296   | 402   | control |
| 13 | 0,67 | 3,2E-02 | -1,12 | ELF1      | 1202  | control |
| 1  | 0,72 | 3,5E-02 | -1,04 | C8B       | -181  | control |
| 4  | 0,72 | 3,9E-02 | -0,94 | ADH7      | -7    | control |
| 1  | 0,33 | 4,0E-02 | -1,13 | PEX19     | 312   | control |
| X  | 0,91 | 4,0E-02 | -0,99 | AFF2      | 1082  | control |
| 8  | 0,55 | 4,0E-02 | -1,10 | KLHL38    | 285   | control |
| 17 | 0,94 | 4,0E-02 | -0,86 | KRT37     | 843   | control |
| 11 | NA   | 4,1E-02 | -1,08 | SAA4      | 452   | control |
| 1  | 0,32 | 4,2E-02 | -1,07 | OLFM3     | 605   | control |
| 21 | NA   | 4,2E-02 | -0,98 | KRTAP20-2 | 1222  | control |
| 13 | 0,29 | 4,3E-02 | -0,84 | FBXL3     | 752   | control |
| 1  | 0,95 | 4,5E-02 | -0,87 | LCE1D     | 391   | control |
| 5  | 0,56 | 4,5E-02 | -0,91 | PCDHA2    | NA    | control |
| 19 | 0,94 | 4,5E-02 | -1,04 | NLRP8     | 56    | control |
| X  | 0,36 | 4,5E-02 | -1,16 | GEMIN8    | -514  | control |
| 20 | 1,00 | 4,5E-02 | -1,01 | LOC284749 | NA    | control |
| 2  | 0,58 | 4,5E-02 | -1,18 | C2orf82   | 135   | control |
| 2  | 0,67 | 4,8E-02 | -1,09 | LIMS1     | 680   | control |
| 2  | 0,46 | 4,9E-02 | -0,89 | CKAP2L    | 4515  | control |
| X  | 0,64 | 4,9E-02 | -1,05 | MIR505    | -50   | control |
| 7  | 0,85 | 5,0E-02 | -0,88 | GRB10     | 945   | control |
| 9  | 0,15 | 5,2E-02 | -1,45 | CDC26     | 696   | control |
| 6  | 0,68 | 5,3E-02 | -1,14 | GJA1      | 2424  | control |
| 18 | NA   | 5,4E-02 | -1,41 | SLC14A1   | -2028 | control |
| 10 | 0,69 | 5,6E-02 | -1,00 | LOC728640 | NA    | control |
| 10 | 0,75 | 5,6E-02 | -1,04 | C10orf11  | 649   | control |
| 14 | 0,82 | 5,7E-02 | -1,02 | JUB       | 1053  | control |

|    |      |         |       |          |       |         |
|----|------|---------|-------|----------|-------|---------|
| 14 | 0,51 | 6,0E-02 | -1,25 | MNAT1    | 1271  | control |
| 8  | 0,85 | 6,0E-02 | -1,18 | OC90     | 1148  | control |
| 6  | 0,00 | 6,1E-02 | -1,08 | MAN1A1   | 772   | control |
| 14 | 0,68 | 6,2E-02 | -0,98 | FERMT2   | NA    | control |
| 14 | 0,52 | 6,4E-02 | -1,32 | ATP5S    | 943   | control |
| 1  | 0,79 | 6,5E-02 | -0,95 | KIAA0467 | -1104 | control |
| 1  | NA   | 6,5E-02 | -1,30 | IPP      | 191   | control |
| 6  | 0,60 | 6,6E-02 | -1,19 | VIP      | 610   | control |
| 11 | 0,35 | 6,6E-02 | -0,90 | IMMP1L   | -1152 | control |
| 5  | 0,52 | 6,8E-02 | -1,17 | PCDHA2   | 3661  | control |
| 12 | 0,68 | 6,9E-02 | -1,06 | PLCZ1    | -790  | control |
| 8  | 0,09 | 7,2E-02 | -1,02 | CHD7     | 937   | control |
| 19 | 0,67 | 7,7E-02 | -1,16 | ZNF546   | 141   | control |
| 19 | 0,56 | 7,7E-02 | -0,97 | ZNF546   | 223   | control |
| 1  | 0,62 | 7,8E-02 | -0,85 | C1orf120 | -199  | control |
| 1  | 0,62 | 7,8E-02 | -0,88 | C1orf120 | -189  | control |
| 8  | 0,28 | 7,8E-02 | -1,39 | FZD6     | NA    | control |
| 18 | 0,47 | 7,9E-02 | -1,20 | ELAC1    | 400   | control |
| 1  | NA   | 8,1E-02 | -1,20 | NR1I3    | NA    | control |
| 7  | 0,37 | 8,3E-02 | -0,96 | HTR5A    | 693   | control |
| 1  | 0,29 | 8,3E-02 | -0,93 | ARID1A   | -27   | control |
| X  | 0,74 | 8,4E-02 | -1,06 | PNPLA4   | 715   | control |
| 3  | 0,81 | 8,5E-02 | -1,28 | MECOM    | NA    | control |
| 22 | 0,67 | 8,7E-02 | -1,08 | MKL1     | 442   | control |
| 1  | 0,62 | 8,9E-02 | -1,12 | SCARNA3  | 702   | control |
| 8  | 0,59 | 8,9E-02 | -0,96 | TPD52    | 691   | control |
| 1  | 0,68 | 9,0E-02 | -1,15 | LASS2    | 1235  | control |
| 1  | 0,68 | 9,0E-02 | -1,12 | LASS2    | 1220  | control |
| 21 | 0,51 | 9,0E-02 | -1,09 | BACE2    | 1160  | control |
| 4  | 0,41 | 9,0E-02 | -0,85 | KLHL5    | 693   | control |
| 17 | NA   | 9,0E-02 | -1,34 | H3F3B    | 902   | control |
| 2  | 0,81 | 9,2E-02 | -1,01 | COL3A1   | 936   | control |
| 11 | 0,58 | 9,7E-02 | -0,88 | PPP1R14B | 1243  | control |
| 9  | 0,43 | 9,9E-02 | -0,96 | OR13C3   | 497   | control |

**Legend:** CHR: chromosome, CH<sub>3</sub> level: methylation level, q-value: corrected p-value, LFC: log fold change, TSS: distance from transcription start site, Groups: group in which hypermethylation was found.

| Genes   | ABI Cat. Number |
|---------|-----------------|
| CHRNA2  | Hs00181267_m1   |
| GRM7    | Hs00356067_m1   |
| DBH     | Hs01089840_m1   |
| NR2E1   | Hs01128417_m1   |
| β-actin | Hs02758991_g1   |
| GAPDH   | Hs01060665_g1   |

**FIGURE S1.** Methylation levels in CHRN2 promoter in suicide completers (suicide; black) and controls (CTRL; white) in the neuronal and non-neuronal cell fractions. **A** Individual CpG methylation levels in the promoter of CHRN2 in the neuronal cell fraction. N: Suicide: 32, CTRL: 11. **B** Total % methylation in CHRN2 promoter in the neuronal cell fraction. **C** Individual CpG methylation levels in the promoter of CHRN2 in the non-neuronal cell fraction. N: Suicide: 42, CTRL: 16. **D** Total % methylation in CHRN2 promoter in the non-neuronal cell fraction. Values are given as mean % of methylation  $\pm$  SEM. \*  $p < 0.05$ . Arrow represents the beginning of TSS.

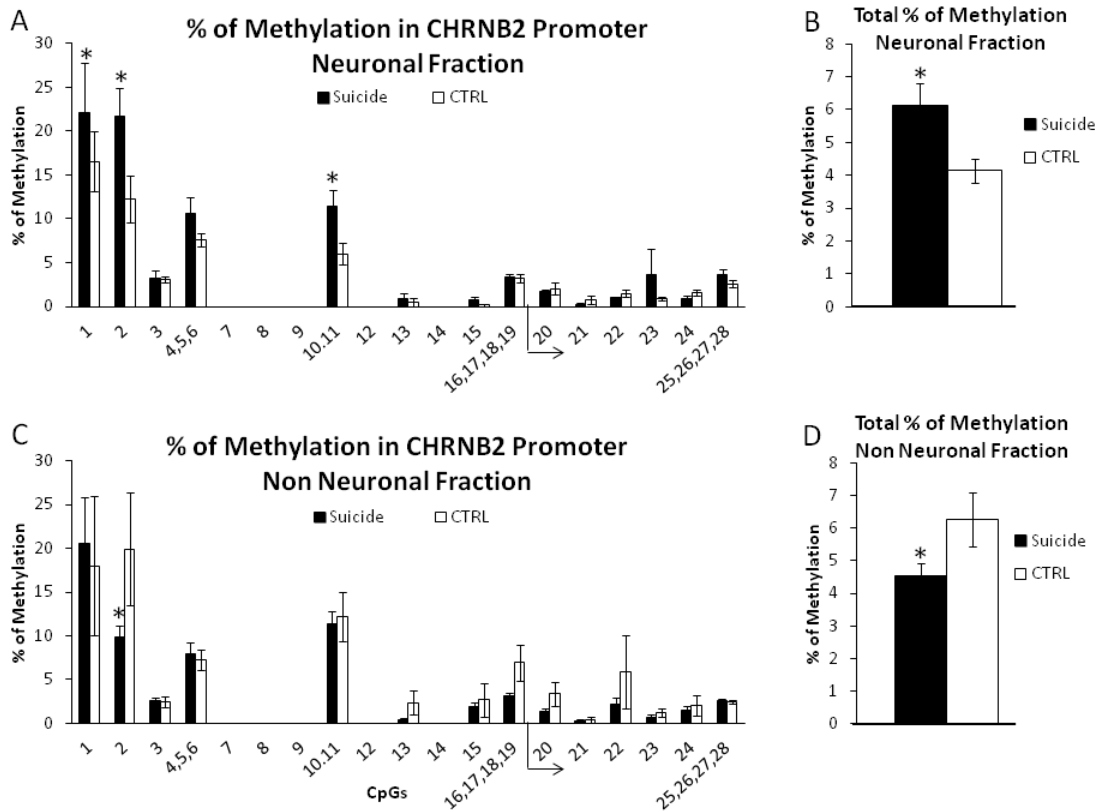



**FIGURE S2.** Methylation levels in GRM7 promoter in suicide completers (suicide; black) and controls (CTRL; white) in the neuronal and non neuronal cell fractions. **A** Individual CpG methylation levels in the promoter of GRM7 in the neuronal cell fraction. N: Suicide: 39, CTRL: 13. **B** Total % methylation in GRM7 promoter in the neuronal cell fraction. **C** Individual CpG methylation levels in the promoter of GRM7 in the non-neuronal cell fraction. N: Suicide: 46, CTRL: 16. **D** Total % methylation in GRM7 promoter in the non-neuronal cell fraction. Values are given as mean % of methylation  $\pm$  SEM. \*  $p < 0.05$ , †  $p < 0.1$ .

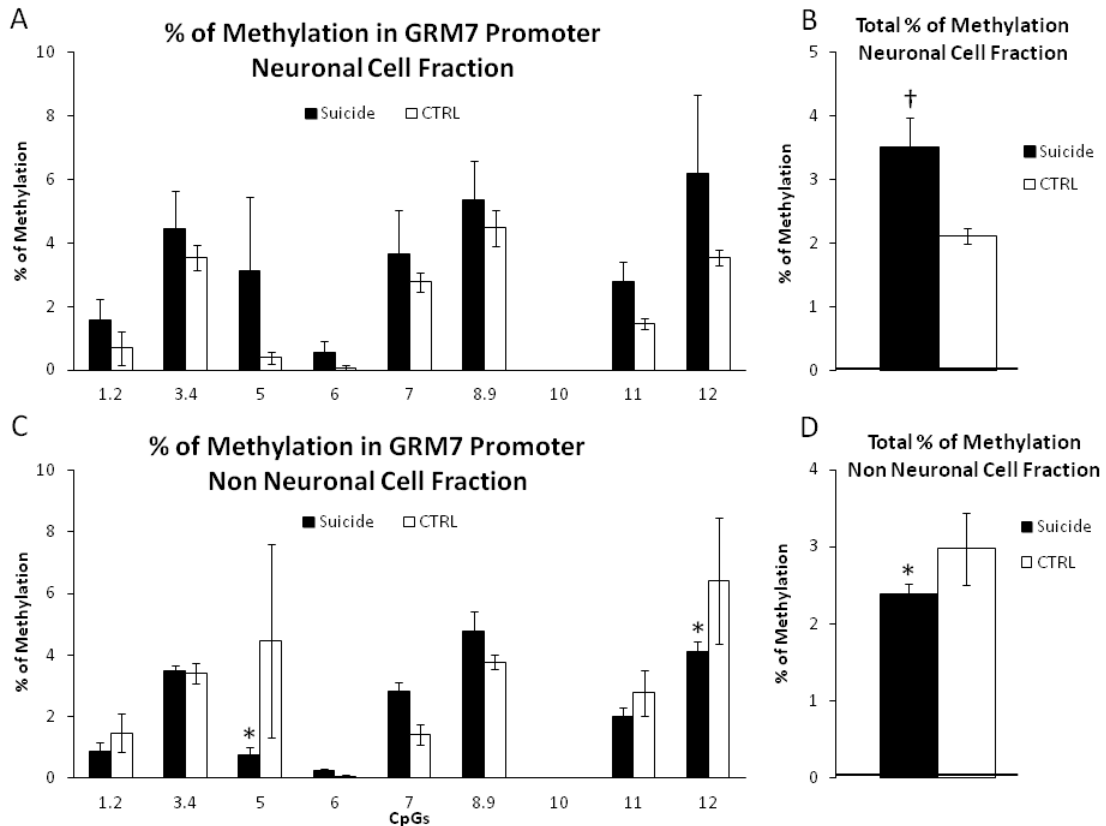

**FIGURE S3.** Methylation levels in DBH promoter in suicide completers (SA; black) and controls (CTRL; white). **A** Individual CpG methylation levels in the promoter of DBH in the neuronal cell fraction. N: Suicide: 33, CTRL: 13. **B** Total % methylation in DBH promoter in the neuronal cell fraction. **C** Individual CpG methylation levels in the promoter of DBH in the non-neuronal cell fraction. N: Suicide: 46, CTRL: 16. **D** Total % methylation in DBH promoter in the non-neuronal cell fraction. Values are given as mean % of methylation  $\pm$  SEM. †  $p < 0.1$ . Arrow represents the beginning of TSS.

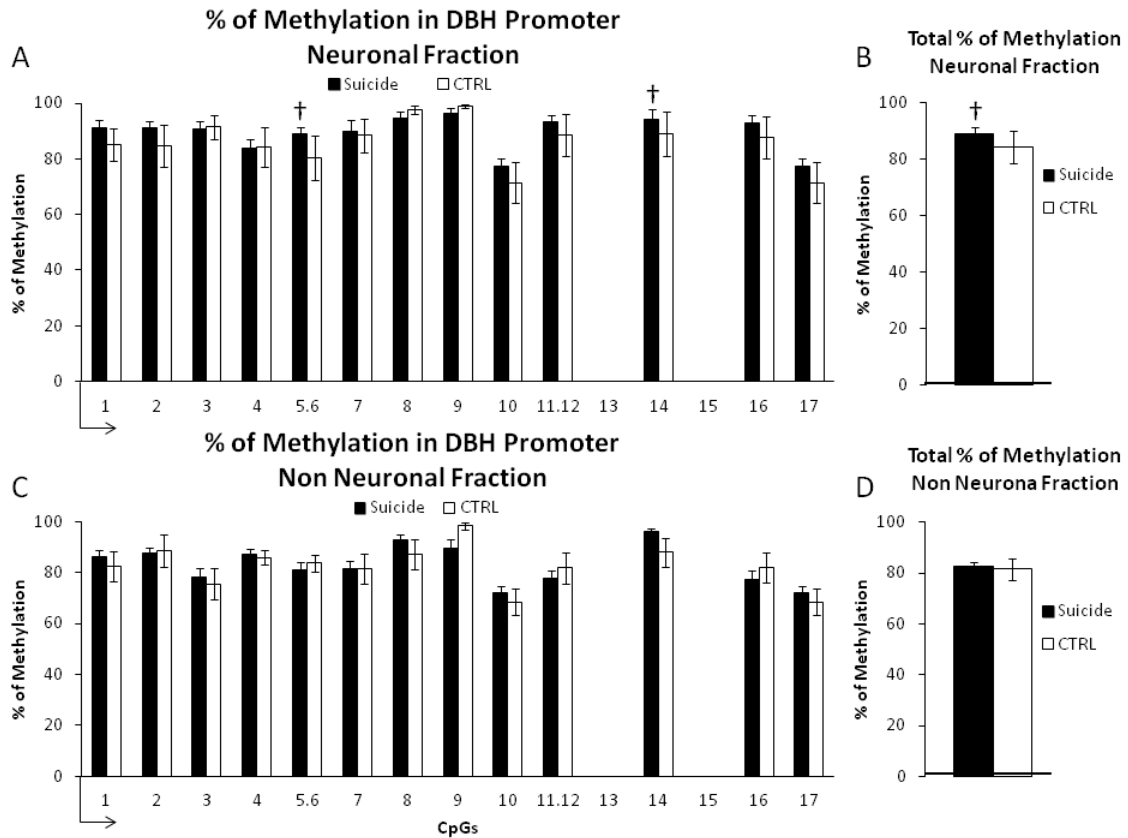

**FIGURE S4.** Gene expression levels for **A** CHRNA2 (N: Suicide: 41, CTRL: 10), **B** GRM7 (N: Suicide: 42, CTRL: 13) and **C** DBH (N: Suicide: 36, CTRL: 10) genes. Values are given as mean % of methylation  $\pm$  SEM. \*  $p < 0.05$ , †  $p < 0.1$ .

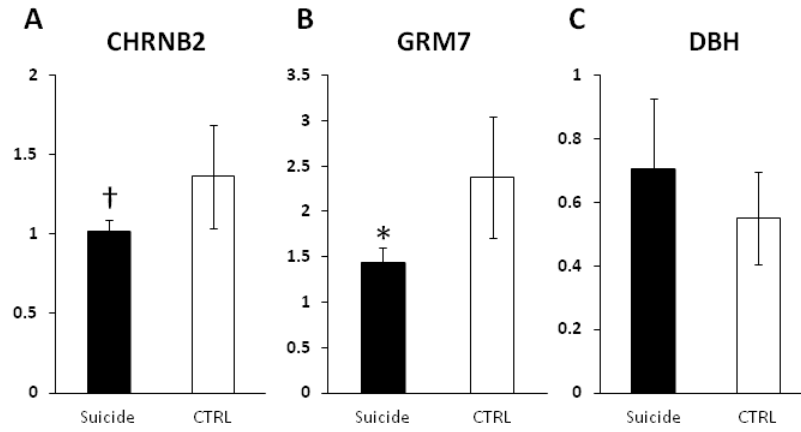

## References

1. Labuda M, Labuda D, Korab-Laskowska M, Cole DE, Zietkiewicz E, Weissenbach J, et al. Linkage disequilibrium analysis in young populations: pseudo-vitamin D-deficiency rickets and the founder effect in French Canadians. *Am J Hum Genet.* 1996 Sep;59(3):633-43.
2. Haines D. *Neuroanatomy: An Atlas of Structures, Sections, and Systems.* 5th ed. Philadelphia, PA: Lippincott Williams & Wilkins; 2000.
3. Nolte J. *The Human Brain: An Introduction to Its Functional Neuroanatomy.* 5th ed. St-Louis, MO: Mosby-Year Book Inc.; 2002.
4. Labonte B, Suderman M, Maussion G, Navaro L, Yerko V, Mahar I, et al. Genome-wide epigenetic regulation by early-life trauma. *Arch Gen Psychiatry.* 2012 Jul;69(7):722-31.
5. Dumais A, Lesage AD, Alda M, Rouleau G, Dumont M, Chawky N, et al. Risk factors for suicide completion in major depression: a case-control study of impulsive and aggressive behaviors in men. *Am J Psychiatry.* 2005 Nov;162(11):2116-24.
6. Brent DA, Perper JA, Moritz G, Allman CJ, Roth C, Schweers J, et al. The validity of diagnoses obtained through the psychological autopsy procedure in adolescent suicide victims: use of family history. *Acta Psychiatr Scand.* 1993 Feb;87(2):118-22.
7. Brewin CR, Andrews B, Gotlib IH. Psychopathology and early experience: a reappraisal of retrospective reports. *Psychol Bull.* 1993 Jan;113(1):82-98.
8. Conner KR, Conwell Y, Duberstein PR. The validity of proxy-based data in suicide research: a study of patients 50 years of age and older who attempted suicide. II. Life events, social support and suicidal behavior. *Acta Psychiatr Scand.* 2001 Dec;104(6):452-7.
9. Hawton K, Appleby L, Platt S, Foster T, Cooper J, Malmberg A, et al. The psychological autopsy approach to studying suicide: a review of methodological issues. *J Affect Disord.* 1998 Sep;50(2-3):269-76.
10. Kelly TM, Mann JJ. Validity of DSM-III-R diagnosis by psychological autopsy: a comparison with clinician ante-mortem diagnosis. *Acta Psychiatr Scand.* 1996 Nov;94(5):337-43.
11. McGirr A, Tousignant M, Routhier D, Pouliot L, Chawky N, Margolese HC, et al. Risk factors for completed suicide in schizophrenia and other chronic psychotic disorders: a case-control study. *Schizophr Res.* 2006 May;84(1):132-43.
12. Association AP. *Diagnostic and statistical manual of mental disorders.* 4th ed. Association AP, editor. Washington DC1994.
13. Spitzer RL, Williams JB, Gibbon M, First MB. The Structured Clinical Interview for DSM-III-R (SCID). I: History, rationale, and description. *Arch Gen Psychiatry.* 1992 Aug;49(8):624-9.
14. Keshet I, Schlesinger Y, Farkash S, Rand E, Hecht M, Segal E, et al. Evidence for an instructive mechanism of de novo methylation in cancer cells. *Nat Genet.* 2006 Feb;38(2):149-53.
15. R Development Core Team. *R: A language and environment for statistical computing.* Vienna, Austria: R Foundation for Statistical Computing; 2007.

16. Bolstad BM, Irizarry RA, Astrand M, Speed TP. A comparison of normalization methods for high density oligonucleotide array data based on variance and bias. *Bioinformatics*. 2003 Jan 22;19(2):185-93.
17. Down TA, Rakyen VK, Turner DJ, Flicek P, Li H, Kulesha E, et al. A Bayesian deconvolution strategy for immunoprecipitation-based DNA methylome analysis. *Nat Biotechnol*. 2008 Jul 8;26(7):779-85.
18. Smyth GK. Limma: linear models for microarray data. In: R. Gentleman VC, S. Dudoit, R. Irizarry, W. Huber editor. *Bioinformatics and Computational Biology Solutions using R and Bioconductor*. New York: Springer,; 2005. p. 397-420.
19. Gentleman RC, Carey VJ, Bates DM, Bolstad B, Dettling M, Dudoit S, et al. Bioconductor: open software development for computational biology and bioinformatics. *Genome Biol*. 2004;5(10):R80.
20. Chen LS, Storey JD. Eigen-R2 for dissecting variation in high-dimensional studies. *Bioinformatics*. 2008 Oct 1;24(19):2260-2.
21. Benjamini Y, Hochberg Y. Controlling the False Discovery Rate - a Practical and Powerful Approach to Multiple Testing. *Journal of the Royal Statistical Society Series B-Methodological*. 1995;57(1):289-300.
22. Stouffer SA. *The American soldier*. Princeton,: Princeton University Press; 1949.
23. Sequeira A, Klempan T, Canetti L, French-Mullen J, Benkelfat C, Rouleau GA, et al. Patterns of gene expression in the limbic system of suicides with and without major depression. *Mol Psychiatry*. 2007 Jul;12(7):640-55.
24. Matevossian A, Akbarian S. Neuronal nuclei isolation from human postmortem brain tissue. *J Vis Exp*. 2008(20).
25. Coolen MW, Statham AL, Gardiner-Garden M, Clark SJ. Genomic profiling of CpG methylation and allelic specificity using quantitative high-throughput mass spectrometry: critical evaluation and improvements. *Nucleic Acids Res*. 2007;35(18):e119.
